# Supplementary material
Source: PubMed Central journal article supplement (PMC7384243)
Supplement: NIHMS1564941-supplement-Supplemental_Material.pdf [file NIHMS1564941-supplement-Supplemental_Material.pdf]

Supplemental Materials for Rohan, Burt, Camuso, Perez, and Meyerhoff, *Applying Experimental Therapeutics to Examine Cognitive and Chronological Vulnerabilities as Mediators of Acute Outcomes in CBT-SAD and Light Therapy for Winter Depression*

**Table SA1: Mean (SD) of Observed Difference Scores (Pre-, Mid-, and Post-Treatment Intervals) for Primary Constructs**

|                  | CBT Group (valid <i>N</i> = 70-84) |         |          |         |          |         | LT Group (valid <i>N</i> = 78-89) |         |          |         |          |         | Whole Sample (valid <i>N</i> = 149-173) |         |          |         |          |         |
|------------------|------------------------------------|---------|----------|---------|----------|---------|-----------------------------------|---------|----------|---------|----------|---------|-----------------------------------------|---------|----------|---------|----------|---------|
|                  | Pre-Mid                            |         | Mid-Post |         | Pre-Post |         | Pre-Mid                           |         | Mid-Post |         | Pre-Post |         | Pre-Mid                                 |         | Mid-Post |         | Pre-Post |         |
| <b>Mediators</b> |                                    |         |          |         |          |         |                                   |         |          |         |          |         |                                         |         |          |         |          |         |
| DAS              | 8.66                               | (21.86) | 10.76    | (19.66) | 18.63    | (23.89) | 14.90                             | (26.88) | 5.92     | (17.17) | 20.33    | (27.46) | 11.95                                   | (24.76) | 8.18     | (18.48) | 19.50    | (25.72) |
| MEQ              | -0.82                              | (5.75)  | -1.05    | (3.98)  | -2.08    | (5.36)  | -2.21                             | (5.84)  | -1.60    | (4.60)  | -3.98    | (6.14)  | -1.54                                   | (5.82)  | -1.34    | (4.31)  | -3.04    | (5.83)  |
| SBQ              | 8.53                               | (12.28) | 10.83    | (14.11) | 18.06    | (17.10) | 6.33                              | (12.58) | 3.02     | (13.86) | 9.02     | (18.25) | 7.39                                    | (12.45) | 6.73     | (14.47) | 13.51    | (18.21) |
| <b>Outcomes</b>  |                                    |         |          |         |          |         |                                   |         |          |         |          |         |                                         |         |          |         |          |         |
| BDI              | 9.37                               | (8.57)  | 6.17     | (6.28)  | 15.20    | (9.33)  | 11.70                             | (7.77)  | 5.15     | (7.14)  | 16.83    | (8.96)  | 10.60                                   | (8.21)  | 5.63     | (6.75)  | 16.04    | (9.15)  |
| SIGH-SAD         | 9.89                               | (8.33)  | 5.43     | (7.89)  | 15.17    | (7.49)  | 9.54                              | (8.40)  | 6.34     | (7.30)  | 15.92    | (7.55)  | 9.70                                    | (8.34)  | 5.92     | (7.57)  | 15.55    | (7.51)  |

*Notes.* BDI = Beck Depression Inventory; CBT = Cognitive-Behavioral Therapy; DAS = Dysfunctional Attitudes Scale; LT = Light Therapy; MEQ = Morningness/Eveningness Questionnaire; SBQ = Seasonal Beliefs Questionnaire; SIGH-SAD = Structured Interview Guide for the Hamilton Rating Scale for Depression—Seasonal Affective Disorder Version. “Pre” = pre-treatment baseline; “Mid” = treatment week 3; “Post” = treatment week 6.

**Table SA2: Zero-Order Correlations Among Observed Difference Scores Between Study Periods, Whole Sample**

|                       | 1.     | 2.     | 3.     | 4.      | 5.     | 6.    | 7.     | 8.     | 9.   | 10.    | 11.     | 12.    | 13.     | 14.    | 15. |
|-----------------------|--------|--------|--------|---------|--------|-------|--------|--------|------|--------|---------|--------|---------|--------|-----|
| 1. DAS Pre-Mid        | ---    |        |        |         |        |       |        |        |      |        |         |        |         |        |     |
| 2. DAS Mid-Post       | -.29** | ---    |        |         |        |       |        |        |      |        |         |        |         |        |     |
| 3. DAS Pre-Post       | .74*** | .43*** | ---    |         |        |       |        |        |      |        |         |        |         |        |     |
| 4. MEQ Pre-Mid        | -.18*  | -.01   | -.18*  | ---     |        |       |        |        |      |        |         |        |         |        |     |
| 5. MEQ Mid-Post       | -.08   | .06    | -.03   | -.37*** | ---    |       |        |        |      |        |         |        |         |        |     |
| 6. MEQ Pre-Post       | -.20*  | .04    | -.15   | .74***  | .34*** | ---   |        |        |      |        |         |        |         |        |     |
| 7. SBQ Pre-Mid        | .16*   | -.03   | .13    | .00     | .04    | .03   | ---    |        |      |        |         |        |         |        |     |
| 8. SBQ Mid-Post       | -.02   | .11    | .06    | -.06    | -.11   | -.17* | -.07   | ---    |      |        |         |        |         |        |     |
| 9. SBQ Pre-Post       | .09    | .07    | .15    | -.05    | -.06   | -.08  | .62*** | .74*** | ---  |        |         |        |         |        |     |
| 10. BDI Pre-Mid       | .35*** | -.09   | .27**  | -.26**  | .19*   | -.12  | .26**  | .00    | .18* | ---    |         |        |         |        |     |
| 11. BDI Mid-Post      | -.08   | .23**  | .09    | .03     | -.16*  | -.07  | -.13   | .10    | -.02 | -.26** | ---     |        |         |        |     |
| 12. BDI Pre-Post      | .26**  | .09    | .30*** | -.21*   | .05    | -.16* | .13    | .07    | .15  | .70*** | .50***  | ---    |         |        |     |
| 13. SIGH-SAD Pre-Mid  | .18*   | -.10   | .10    | .00     | .11    | .08   | .28**  | -.01   | .18* | .38*** | -.39*** | .05    | ---     |        |     |
| 14. SIGH-SAD Mid-Post | -.12   | .15    | -.01   | -.02    | -.07   | -.08  | -.16   | .09    | -.04 | -.21*  | .56***  | .22**  | -.56*** | ---    |     |
| 15. SIGH-SAD Pre-Post | .07    | .05    | .10    | .00     | .05    | .02   | .17*   | .09    | .18* | .22**  | .15     | .33*** | .55***  | .39*** | --- |

Notes. Pairwise *N* ranges from 138-173. “Pre” = pre-treatment baseline; “Mid” = treatment week 3; “Post” = treatment week 6. See Table SA1 for measure abbreviations.

\*  $p < .05$ ; \*\*  $p < .01$ ; \*\*\*  $p < .001$ .

**Table SA3: Zero-Order Correlations Among Observed Difference Scores Between Study Periods, By Treatment Group**

|                       | 1.     | 2.     | 3.     | 4.      | 5.    | 6.     | 7.     | 8.     | 9.     | 10.    | 11.    | 12.    | 13.     | 14.     | 15.    |
|-----------------------|--------|--------|--------|---------|-------|--------|--------|--------|--------|--------|--------|--------|---------|---------|--------|
| 1. DAS Pre-Mid        | ---    | -.28** | .80*** | -.16    | -.19  | -.24*  | .27*   | .07    | .24*   | .26*   | -.08   | .16    | .08     | -.07    | .01    |
| 2. DAS Mid-Post       | -.30** | ---    | .36*** | -.08    | .17   | .06    | -.08   | .00    | -.06   | .00    | .17    | .13    | .04     | .13     | .19    |
| 3. DAS Pre-Post       | .65*** | .53*** | ---    | -.20    | -.08  | -.20   | .21    | .07    | .20    | .25*   | .02    | .24*   | .11     | .01     | .14    |
| 4. MEQ Pre-Mid        | -.17   | .02    | -.13   | ---     | -.29* | .75*** | -.03   | -.04   | -.06   | -.23*  | .02    | -.18   | .12     | -.06    | .13    |
| 5. MEQ Mid-Post       | .10    | -.07   | .03    | -.51*** | ---   | .41**  | -.07   | -.11   | -.13   | .12    | -.12   | .00    | .13     | -.07    | .06    |
| 6. MEQ Pre-Post       | -.10   | -.03   | -.07   | .73***  | .22   | ---    | -.08   | -.19   | -.20   | -.10   | -.05   | -.14   | .19     | -.10    | .15    |
| 7. SBQ Pre-Mid        | .04    | .00    | .04    | .02     | .16   | .14    | ---    | -.04   | .65*** | .42*** | -.21   | .20    | .37***  | -.25*   | .20    |
| 8. SBQ Mid-Post       | -.04   | .16    | .09    | -.15    | -.16  | -.28*  | -.15   | ---    | .73*** | .05    | .00    | .04    | .04     | .06     | .12    |
| 9. SBQ Pre-Post       | .00    | .13    | .12    | -.11    | -.01  | -.03   | .59*** | .71*** | ---    | .35**  | -.14   | .18    | .28*    | -.14    | .22*   |
| 10. BDI Pre-Mid       | .46*** | -.14   | .30**  | -.27*   | .29*  | -.09   | .12    | .03    | .11    | ---    | -.27*  | .65*** | .40***  | -.15    | .32**  |
| 11. BDI Mid-Post      | -.06   | .29*   | .18    | .04     | -.23* | -.11   | -.05   | .18    | .11    | -.25*  | ---    | .56*** | -.43*** | .62***  | .15    |
| 12. BDI Pre-Post      | .38*** | .07    | .36*** | -.22    | .11   | -.15   | .08    | .15    | .18    | .76**  | .45*** | ---    | .01     | .36***  | .39*** |
| 13. SIGH-SAD Pre-Mid  | .37**  | -.26*  | .10    | -.15    | .09   | -.10   | .17    | -.08   | .05    | .39*** | -.35** | .12    | ---     | -.55*** | .59*** |
| 14. SIGH-SAD Mid-Post | -.22   | .18    | -.04   | .06     | -.07  | -.01   | -.04   | .17    | .11    | -.31** | .50*** | .06    | -.58**  | ---     | .36*** |
| 15. SIGH-SAD Pre-Post | .15    | -.09   | .05    | -.15    | .03   | -.10   | .14    | .08    | .18    | .12    | .15    | .27*   | .50***  | .42***  | ---    |

*Notes.* Values for the Cognitive-Behavioral Therapy (CBT) group are shown above the diagonal, and for the Light Therapy (LT) group are shown below the diagonal. Pairwise *N* ranges from 74-88 for the CBT group and from 74-89 for the LT group. “Pre” = pre-treatment baseline; “Mid” = treatment week 3; “Post” = treatment week 6. See Table SA1 for measure abbreviations.

\*  $p < .05$ ; \*\*  $p < .01$ ; \*\*\*  $p < .001$ .

**Table SA4: Model Fit Statistics for Models Including Covariates<sup>1</sup>**

|                       | $\chi^2$ |    |       | RMSEA |              | CFI  | TLI   | SRMR |
|-----------------------|----------|----|-------|-------|--------------|------|-------|------|
| Outcome<br>(Mediator) | value    | df | p     | value | 90% CI       |      |       |      |
| <b>SIGH-SAD</b>       |          |    |       |       |              |      |       |      |
| Model 1 (MEQ)         | 98.102   | 74 | .0319 | .046  | [.014, .069] | .971 | 0.956 | .043 |
| Model 2 (SBQ)         | 129.877  | 74 | .0001 | .070  | [.050, .090] | .911 | 0.862 | .051 |
| Model 3 (DAS)         | 102.065  | 74 | .0170 | .050  | [.022, .072] | .958 | 0.935 | .043 |
| <b>BDI-II</b>         |          |    |       |       |              |      |       |      |
| Model 1 (MEQ)         | 26.800   | 23 | .2646 | .033  | [.000, .077] | .994 | 0.984 | .018 |
| Model 2 (SBQ)         | 49.890   | 23 | .0010 | .087  | [.054, .120] | .926 | 0.818 | .041 |
| Model 3 (DAS)         | 27.144   | 23 | .2499 | .034  | [.000, .078] | .990 | 0.976 | .022 |

*Notes.* CFI = comparative fit index; CI = confidence interval; RMSEA = root mean square error of approximation; SRMR = standardized root mean residual; TLI = Tucker-Lewis index. See Table SA1 for measure abbreviations.

<sup>1</sup>Covariates included gender, age, medication status, comorbidity status, ethnicity, and pre-treatment time interval.

**Table SA5: Treatment-Mediator and Mediator-Outcome Path Estimates for Models Including Covariates**

| Outcome (Mediator) | Treatment-Mediator Path |             |         | Mediator-Outcome Path |             |         |
|--------------------|-------------------------|-------------|---------|-----------------------|-------------|---------|
|                    | b                       | <i>p</i>    | $\beta$ | b                     | <i>p</i>    | $\beta$ |
| <b>SIGH-SAD</b>    |                         |             |         |                       |             |         |
| Model 1 (MEQ)      | <b>0.223</b>            | <b>.027</b> | 0.809   | 4.748                 | .479        | 0.338   |
| Model 2 (SBQ)      | <b>0.864</b>            | <b>.003</b> | 0.396   | <b>0.268</b>          | <b>.005</b> | 0.159   |
| Model 3 (DAS)      | -0.207                  | .648        | -0.083  | 0.188                 | .247        | 0.125   |
| <b>BDI-II</b>      |                         |             |         |                       |             |         |
| Model 1 (MEQ)      | <b>0.228</b>            | <b>.022</b> | 0.681   | -7.119                | .284        | -1.860  |
| Model 2 (SBQ)      | <b>0.882</b>            | <b>.002</b> | 0.423   | <b>0.228</b>          | <b>.040</b> | 1.059   |
| Model 3 (DAS)      | -0.014                  | .975        | -0.004  | <b>0.225</b>          | <b>.034</b> | .876    |

*Notes.* All paths represent regressions of slope of mediator and/or slope of outcome on the given predictor variable (slope of mediator / treatment group assignment) in the context of an overall structural equation model. See Table SA1 for measure abbreviations.
